# Supplementary material for: Structural analysis of petroporphyrins from asphaltene by trapped ion mobility coupled with Fourier transform ion cyclotron resonance mass spectrometry
Source: Royal Society of Chemistry journal article supplement (doi:10.1039/d1an00140j), 2021-01-01
Supplement: d1an00140j1.pdf [file d1an00140j1.pdf]

# Supporting information for structural analysis of petroporphyrins from asphaltene by trapped ion mobility coupled with a Fourier transform ion cyclotron resonance mass spectrometer

Julien Maillard<sup>1,3</sup>, Johann Le Maître<sup>1,2,3</sup>, Christopher P. Rüger<sup>3,4,6</sup>, Mark Ridgeway<sup>5</sup>, Christopher J. Thompson<sup>5</sup>, Benoit Paupy<sup>2,3</sup>, Marie Hubert-Roux<sup>1,3</sup>, Melvin Park<sup>5</sup>, Carlos Afonso<sup>1,3\*</sup>, Pierre Giusti<sup>1,2,3</sup>

<sup>1</sup>Normandie Université, COBRA, UMR 6014 et FR 3038, Université de Rouen, INSA de Rouen-Normandie, CNRS, IRCOF, Mont Saint Aignan Cedex.

<sup>2</sup>TOTAL Refining & Chemicals, Total Research & Technology Gonfreville, BP 27, 76700 Harfleur, France.

<sup>3</sup>International Joint Laboratory - iC2MC: Complex Matrices Molecular Characterization, TRTG, BP 27, 76700 Harfleur, France.

<sup>4</sup>Joint Mass Spectrometry Centre/Chair of Analytical Chemistry, University of Rostock, 18059 Rostock, Germany.

<sup>5</sup>Bruker Daltonics, Billerica, MA 01821, USA.

<sup>6</sup>Department Life, Light & Matter (LLM), University of Rostock, 18051 Rostock, Germany

## Supplementary information summary:

- Figure S1: 2D TIMS-FTICR-MS survey spectra of the Athabasca asphaltene.
- Figure S2. (A) Two-dimensional IMS-MS diagram illustrating the  $^{TIMS}CCSN_2$  ( $\text{Å}^2$ ) measured as a function of the  $m/z$  ratio of hydrocarbons, heteroatomic classes (N1, O1, O2 and S1) and Vanadium petroporphyrins (N4V1O1).
- Figure S3. (a) Kendrick diagram of the complex petroleum molecular pattern highlighting the position of the petroporphyrins, and (b) DBE vs #C of the detected petroporphyrins.
- Figure S4 Summary compound class bar diagram of the analyzed Athabasca asphaltene.
- Table S1. Literature  $CCSN_2$  ( $\text{Å}^2$ ) of the tuning mix ions
- Table S2. Internal signals used for the  $m/z$  calibration
- Table S3 : Repeatability measurements for a series of hydrocarbons species
- Fitting procedure on OriginPro
- Figure S6 : EIC of the  $m/z$  514.19318 and the corresponding Gaussian fitting (red line) generated using OriginPro.
- TWIMS TOF experiments details
- Figure S7: Calibration curve obtained for the tuning mix on the Synapt G2.
- Figure S8: DBE vs #C of the O2 (a) and N4O1V1 (b) families.
- Figure S9: Hypothetical structures of  $m/z$  514.1932 ( $C_{30}H_{31}N_4O_1V_1^+$ , DBE 18).
- Figure S10: Hypothetical structures of  $m/z$  554.22450 ( $C_{33}H_{35}N_4O_1V_1^+$ , DBE 19).
- **Figure S11: Common porphyrins structures found in asphaltene samples.**
- Figure S12: Structures of the drug mix compounds used for the peak width (FWHM) analysis.

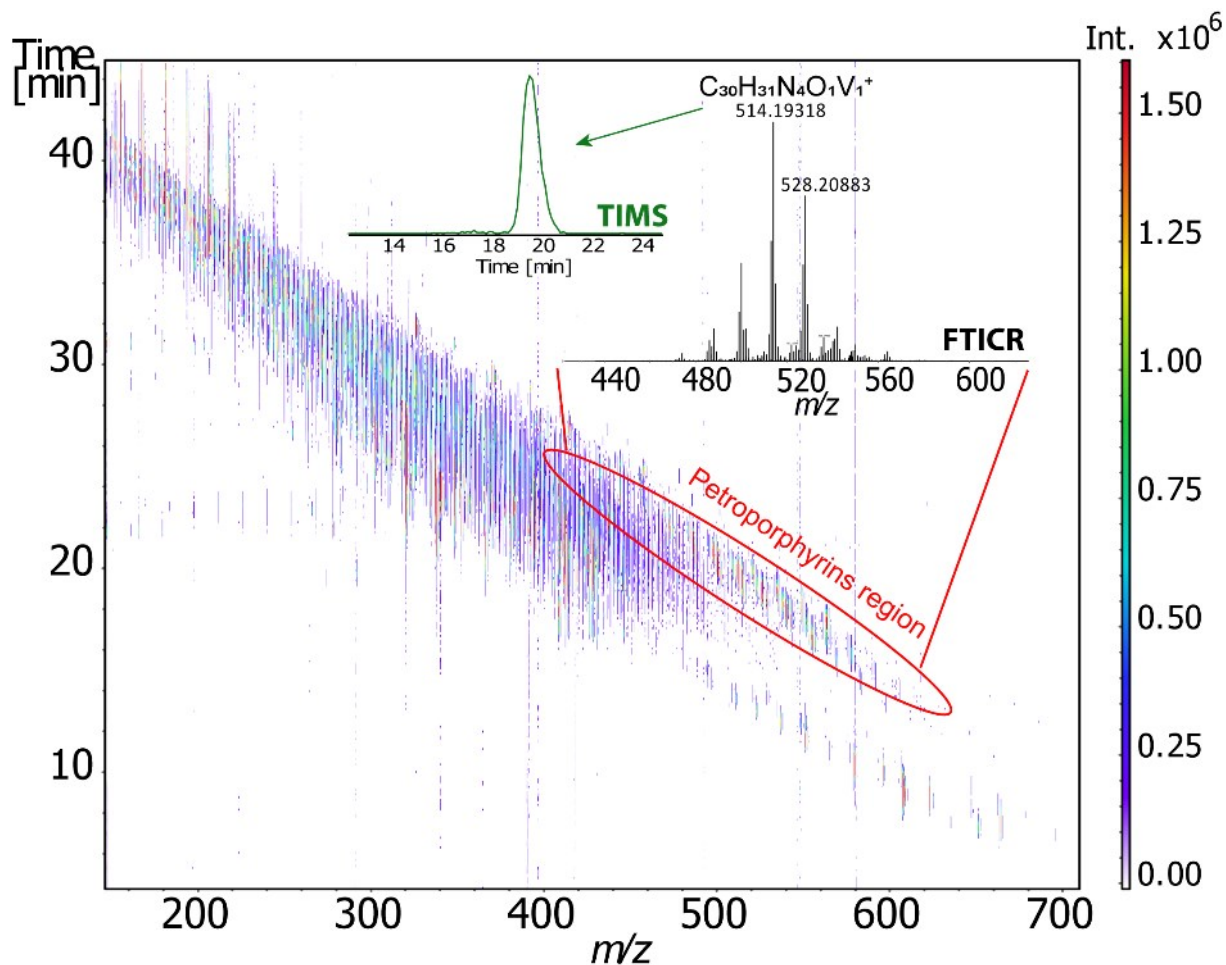

Figure S1: 2D TIMS-FTICR-MS survey spectra of the Athabasca asphaltene. The  $m/z$  versus mobility region for the porphyrins is depicted and the average mass spectrum of the section is given as insert. The extracted mobilogram of  $C_{30}H_{31}N_4O_1V_1^+$  was chosen to visualize the rather narrow mono-modal Gaussian distribution.

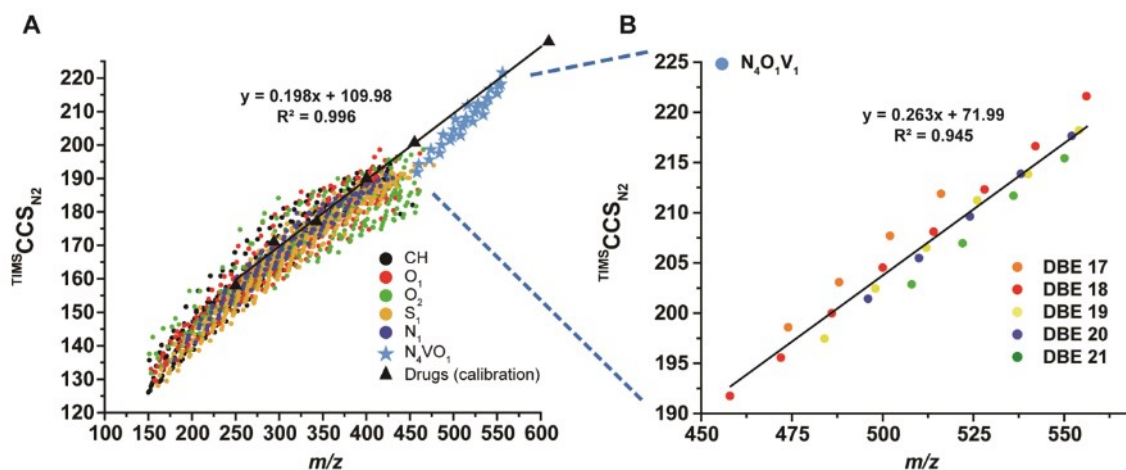

Figure S2. (A) Two-dimensional IMS-MS diagram illustrating the  $TIMS_{CCS_{N_2}}$  ( $\text{\AA}^2$ ) measured as a function of the  $m/z$  ratio of hydrocarbons, heteroatomic classes ( $N_1$ ,  $O_1$ ,  $O_2$  and  $S_1$ ) and Vanadium porphyrins ( $N_4V_1O_1$ ). (B) Enlargement of the diagram in the range  $m/z$  450-575.

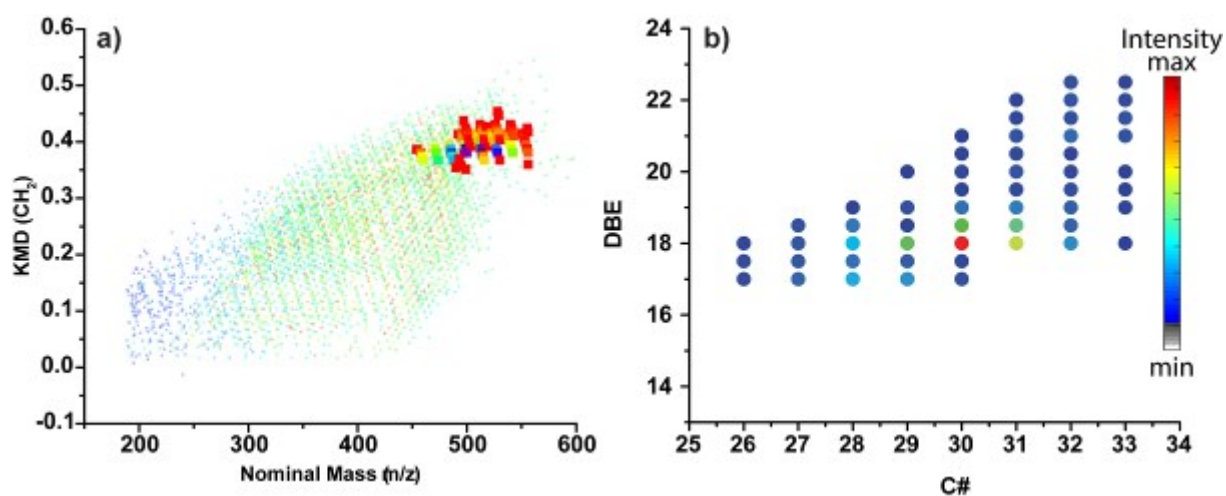

Figure S3. (a) Kendrick diagram of the complex petroleum molecular pattern highlighting the position of the petroporphyrins, and (b) DBE vs #C of the detected petroporphyrins.

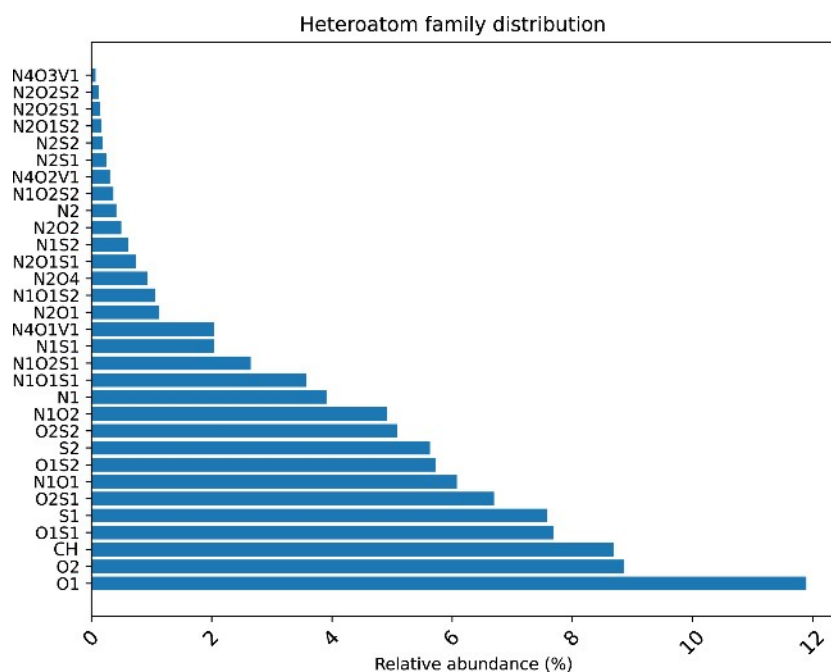

Figure S4 Summary compound class bar diagram of the analyzed Athabasca asphaltene.

Nitrogen and CH species are found in a region with a higher CCS value, indicating a high content of long alkyl chains. However, sulfur class is found in a region with a lower CCS value, indicating the presence of more aromatic compounds. Nitrogen species are distributed over the whole range of mobility (aliphatic and aromatic).

Porphyrins with metal produces a large mass displacement compared to the mobility displacement. They do not follow the general trend of the mobility pattern of the classical petrochemical classes. The space occupied by the porphyrins is shifted to a region with higher  $m/z$  and CCS values than the other molecules detected.

Figure S1B shows an enlargement of the ion mobility distribution of porphyrin species  $N_4O_1V_1$ . A linear relationship with an  $R^2$  coefficient of determination of 0.945 is obtained between CCS and  $m/z$  ratio. This linearity can be explained by the fact that molecules of the same family tend to follow a straight line. This notion has been shown by Woods et al<sup>33</sup>, and by Lalli et al<sup>25</sup> in the case of oil samples.

Table S1. Literature  $CCS_{N_2}$  ( $\text{\AA}^2$ ) of the tuning mix ions

| Index | $[M+H]^+$<br>calculated<br>$m/z$ | $CCS_{N_2}$ ( $\text{\AA}^2$ ) | $K_0$ |
|-------|----------------------------------|--------------------------------|-------|
| 1     | 322.04812                        | 153.73                         | 1.376 |
| 2     | 622.02896                        | 202.96                         | 1.013 |
| 3     | 922.0098                         | 243.64                         | 0.835 |

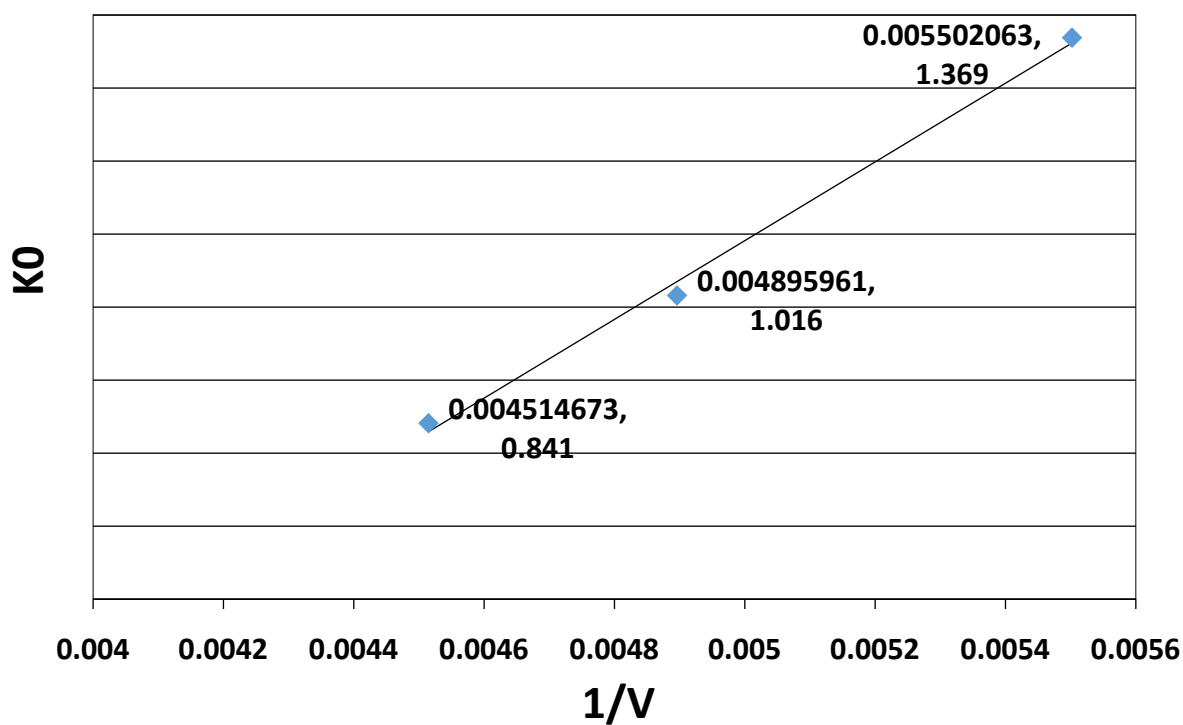

Figure S5: Calibration curve of the tune mix representing  $K_0$  values in function of the  $1/V$  value. The  $R^2$  of the linear fitting and the corresponding equation used for the calibration is also displayed on the graph.

| <b>Table S2 : Internals signals used for the calibration</b> |               |           |        |
|--------------------------------------------------------------|---------------|-----------|--------|
|                                                              | # Hydrocarbon | m/z       | charge |
| C15H23                                                       |               | 203.17943 | 1+     |
| C16H25                                                       |               | 217.19508 | 1+     |
| C17H17                                                       |               | 221.13248 | 1+     |
| C18H15                                                       |               | 231.11683 | 1+     |
| C17H27                                                       |               | 231.21073 | 1+     |
| C19H17                                                       |               | 245.13248 | 1+     |
| C18H29                                                       |               | 245.22638 | 1+     |
| C20H19                                                       |               | 259.14813 | 1+     |
| C19H31                                                       |               | 259.24203 | 1+     |
| C20H33                                                       |               | 273.25768 | 1+     |
| C22H21                                                       |               | 285.16378 | 1+     |
| C21H35                                                       |               | 287.27333 | 1+     |
| C22H37                                                       |               | 301.28898 | 1+     |
| C24H21                                                       |               | 309.16378 | 1+     |
| C23H39                                                       |               | 315.30463 | 1+     |
| C25H25                                                       |               | 325.19508 | 1+     |
| C24H41                                                       |               | 329.32028 | 1+     |
| C27H35                                                       |               | 359.27333 | 1+     |
| C29H39                                                       |               | 387.30463 | 1+     |
| C30H43                                                       |               | 403.33593 | 1+     |
| C32H47                                                       |               | 431.36723 | 1+     |
| C34H51                                                       |               | 459.39853 | 1+     |

**Table S3 : Repeatability measurements for a series of hydrocarbons species**

| Formula | m/z        | Apex value R1 (s) | Apex value R2 (s) | Apex value R3 (s) | Deviation (s) |
|---------|------------|-------------------|-------------------|-------------------|---------------|
| C21H28  | 280.218707 | 715.4             | 715.3             | 716.1             | 0.4           |
| C22H26  | 290.203064 | 724.5             | 723.7             | 724.4             | 0.4           |
| C23H24  | 300.187418 | 714.2             | 713               | 713.9             | 0.6           |
| C24H22  | 310.171776 | 707.8             | 708.2             | 708.8             | 0.5           |
| C24H24  | 312.187423 | 693.3             | 692.6             | 693.4             | 0.4           |
| C25H20  | 320.156128 | 705.2             | 704.8             | 705.4             | 0.3           |
| C25H24  | 324.187429 | 671.5             | 671.9             | 672.4             | 0.5           |
| C27H20  | 344.156138 | 668.2             | 668.3             | 668.8             | 0.3           |

## Fitting on OriginPro

For each detected porphyrins, the extract ion chromatogram (EIC) or more correctly, the extract ion mobilogram (EIM), was extracted and plotted in OriginPro (see exemplarily Figure S6). Using a Gaussian nonlinear curve fitting, each peak apex was recovered and converted to the corresponding scan number. This scan number was then assigned to a particular TIMS funnel voltage which allow the recovering of the collision cross section (CCS) using the calibration curve (Figure S2).

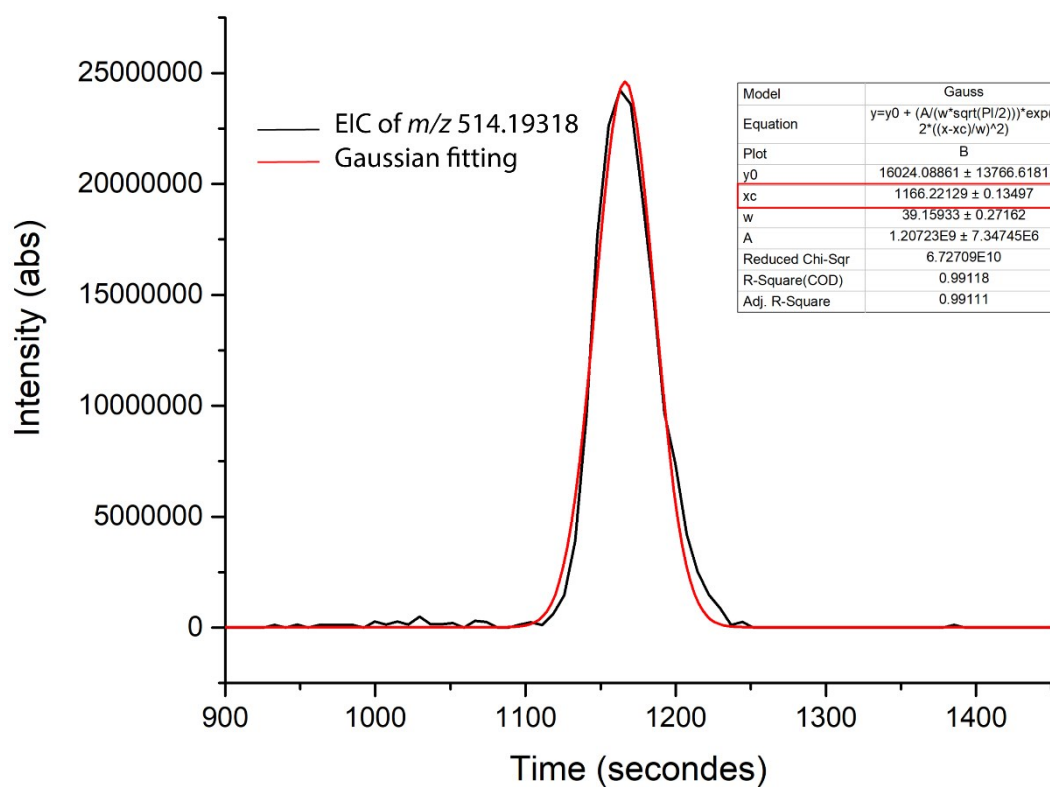

Figure S6 : EIC of the  $m/z$  514.19318 and the corresponding Gaussian fitting (red line) generated using OriginPro. The peak apex position can be extracted with high accuracy. Slight deviation at distribution edges can be seen, not inflicting deviations for the FWHM and peak apex extraction.

## TWIMS TOF experiments

The standard porphyrins (vanadyl-octaethylporphyrin) was analysed on a Synapt G2 (Waters, Manchester) in APPI+ using following parameters. Resolution mode : W, Mass range : 50 Da to 1200 Da. Repeller (kV) :1.0, Probe Temp (C): 600.0, Source Temperature (°C):120, Sampling Cone: 20, Extraction Cone: 5, Cone Gas Flow (L/Hr): 50.0, Desolvation Gas Flow (L/Hr): 800.0. IMS parameters were sets as followed. IMS Wave Velocity (m/s): 200, IMS Wave Height (V): 13.0, HeliumCellGasFlow: 180, IMS Gas Flow (mL/min): 90.00. The EIC of the detected standard was extracted and fitted using OriginPro following the same precedent procedure. Using the same parameters, the TWIMS cell was calibrated using the tuning mix in *electrospray* positive. ESI parameters were sets as followed. Capillary (kV): 2.5, Source Temperature (°C): 120, Sampling Cone: 40, Extraction Cone: 5, Desolvation Temperature (°C): 300, Cone Gas Flow (L/Hr):50.0. The resulting calibration curve is given in figure S4. By taking the equation of the power fitting obtained for the calibration curve, the collision cross section of the porphyrin standard has been recovered.

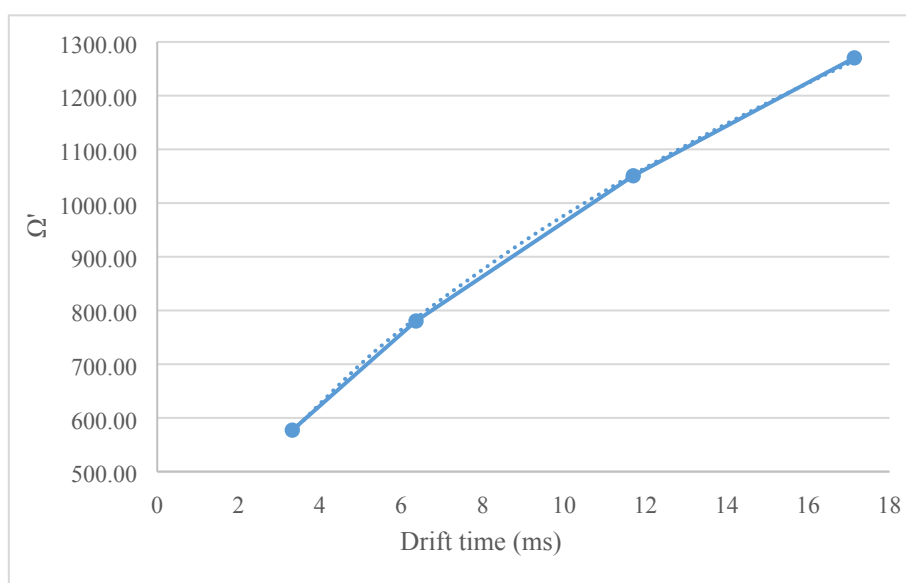

Figure S7: Calibration curve obtained for the tuning mix on the Synapt G2.

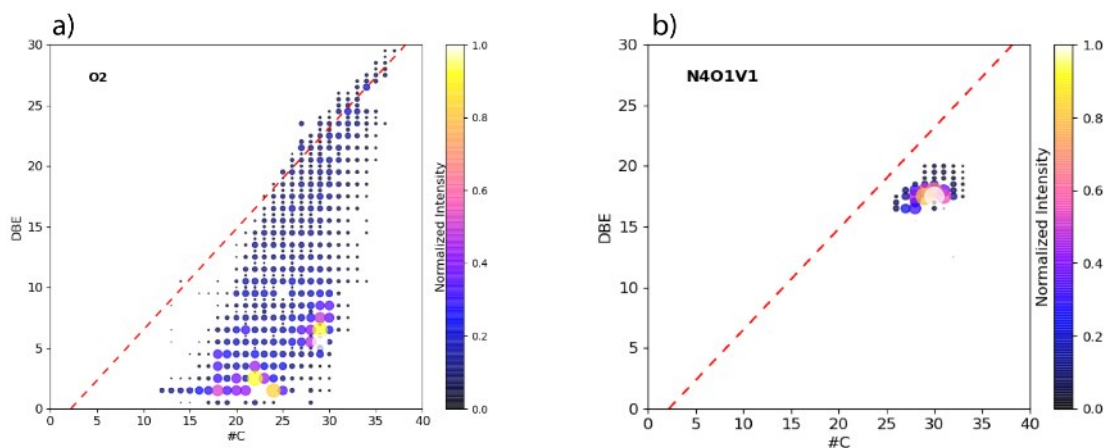

Figure S8: DBE vs #C of the O<sub>2</sub> (a) and N<sub>4</sub>O<sub>1</sub>V<sub>1</sub> (b) families. Despite the potential of very low *m/z* deviations (mass splits) between O<sub>2</sub> and N<sub>4</sub>O<sub>1</sub>V<sub>1</sub> class compounds, the uniform distribution validate the molecular formula attribution.

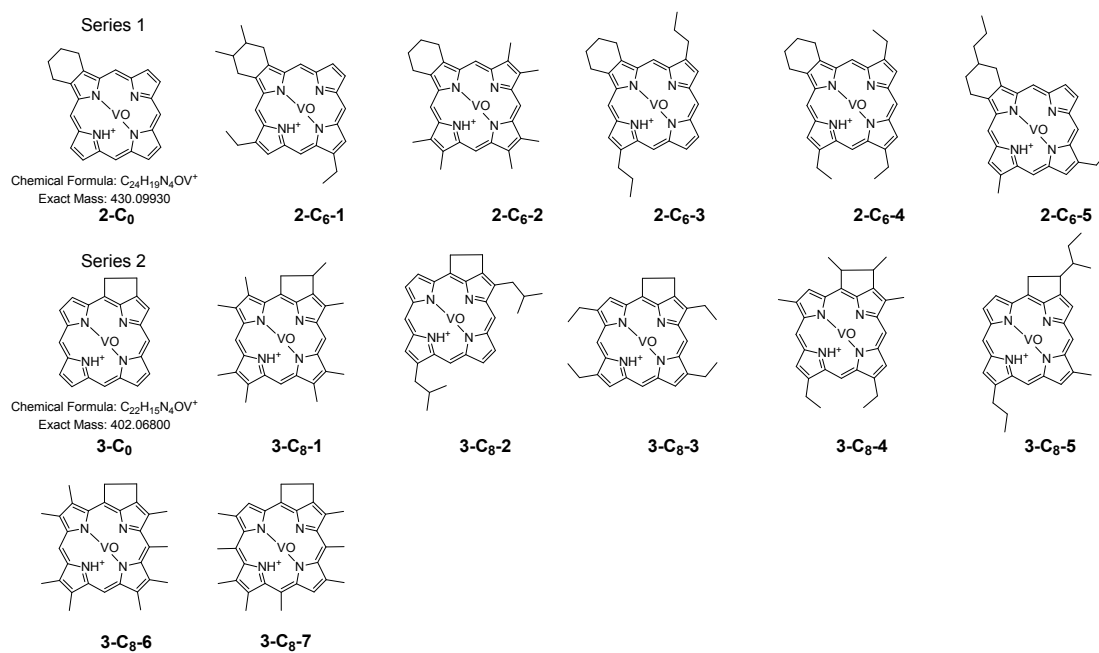

Figure S9: Hypothetical structures of *m/z* 514.1932 (C<sub>30</sub>H<sub>31</sub>N<sub>4</sub>O<sub>1</sub>V<sub>1</sub><sup>+</sup>, DBE 18). Series 1 is composed of porphyrins based on the basic core with a six-membered naphthenic ring. Series 2 is based on the basic core with a five-membered naphthenic ring.



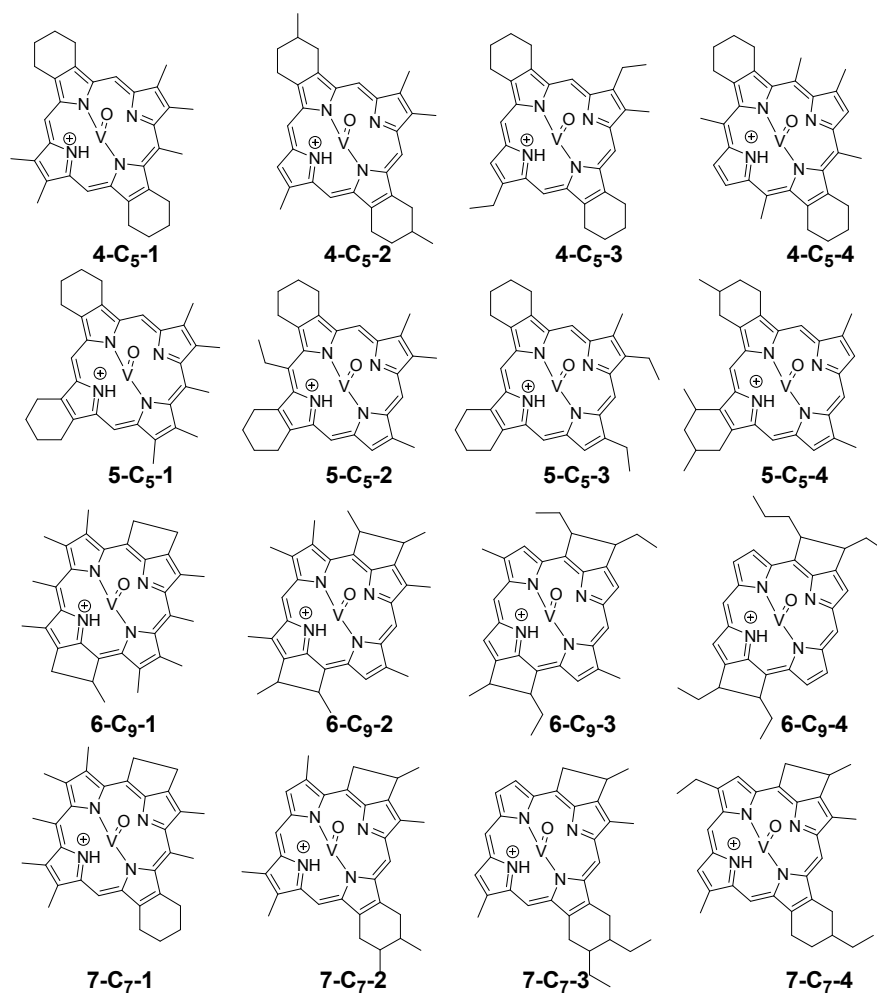

Figure S10: Hypothetical structures of  $m/z$  554.22450 ( $C_{33}H_{35}N_4O_1V_1^+$ , DBE 19).

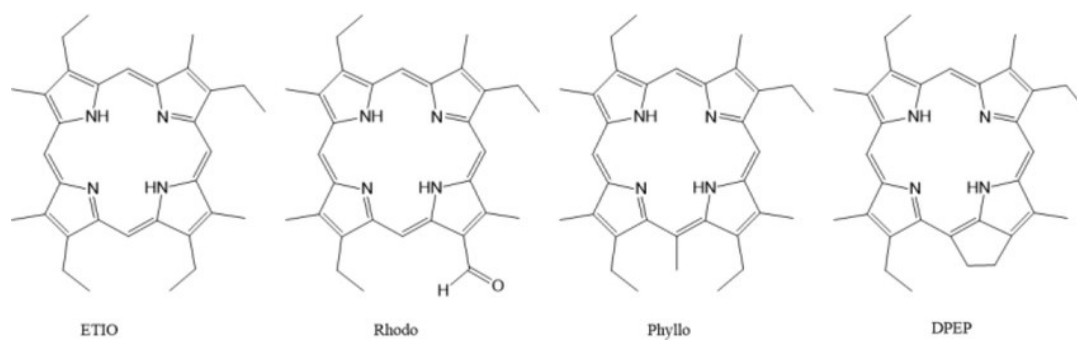

Figure S11: Common porphyrins structures found in asphaltene samples.

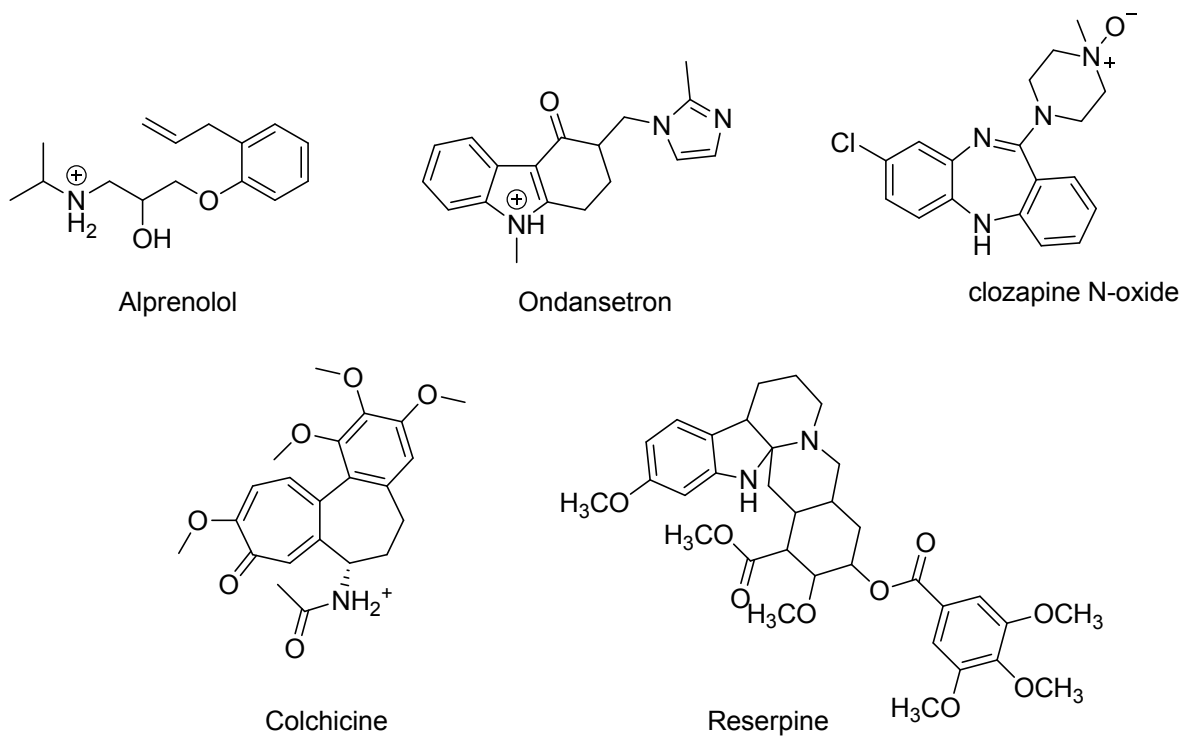

Figure S12: Structures of the drug mix compounds used for the peak width (FWHM) analysis.
